# Supplementary material
Source: PubMed Central journal article supplement (PMC3582800)

day 30 cTnT

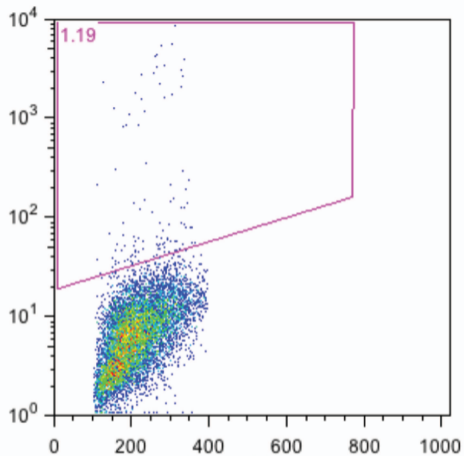

Stage 1 + insulin

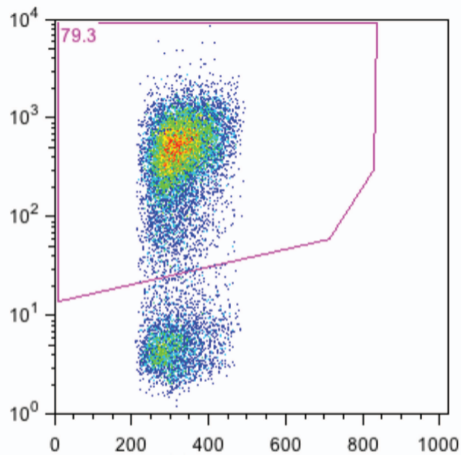

Stage 1 - insulin

Forward Scatter

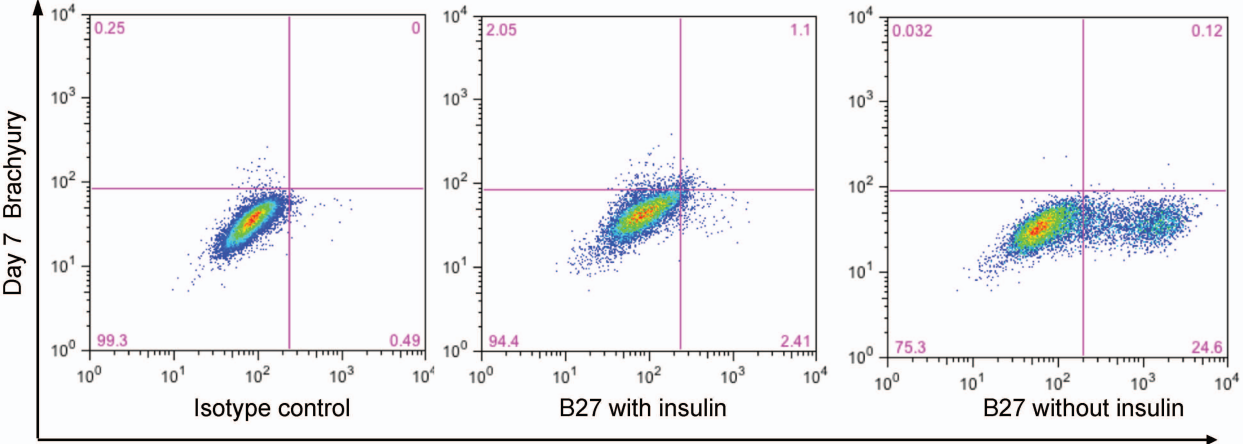

Day 7 Nkx2.5

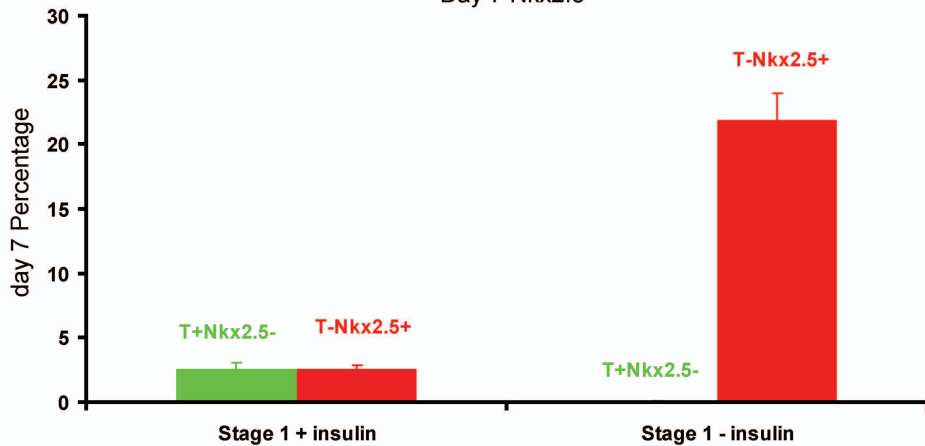

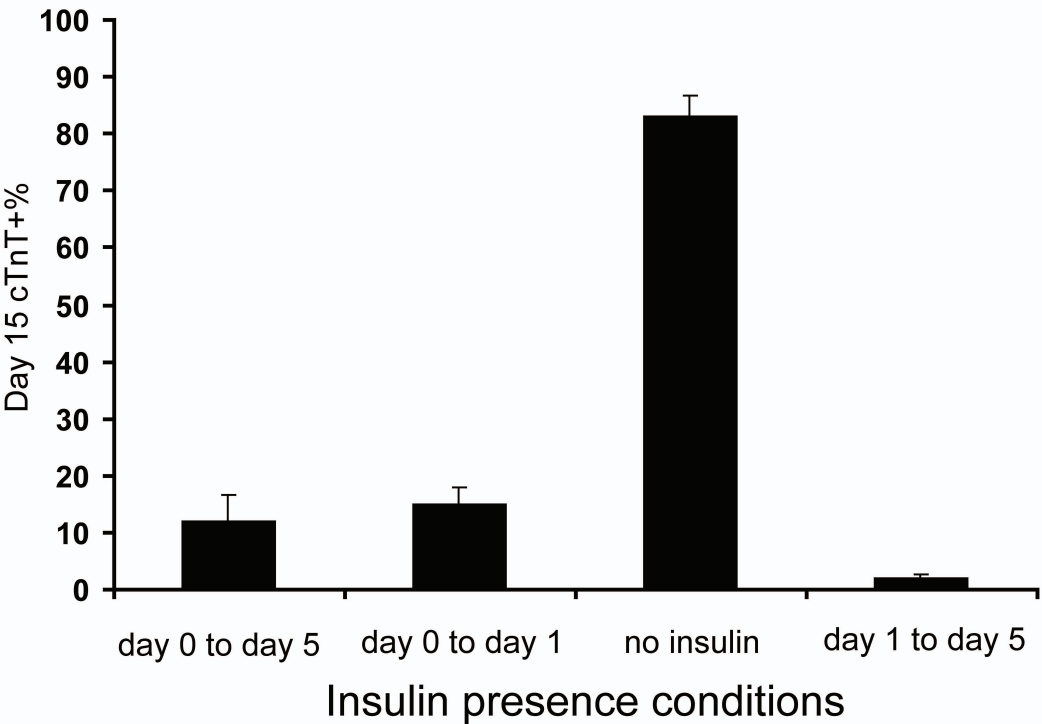

## H9-7TGP-ishcat-1

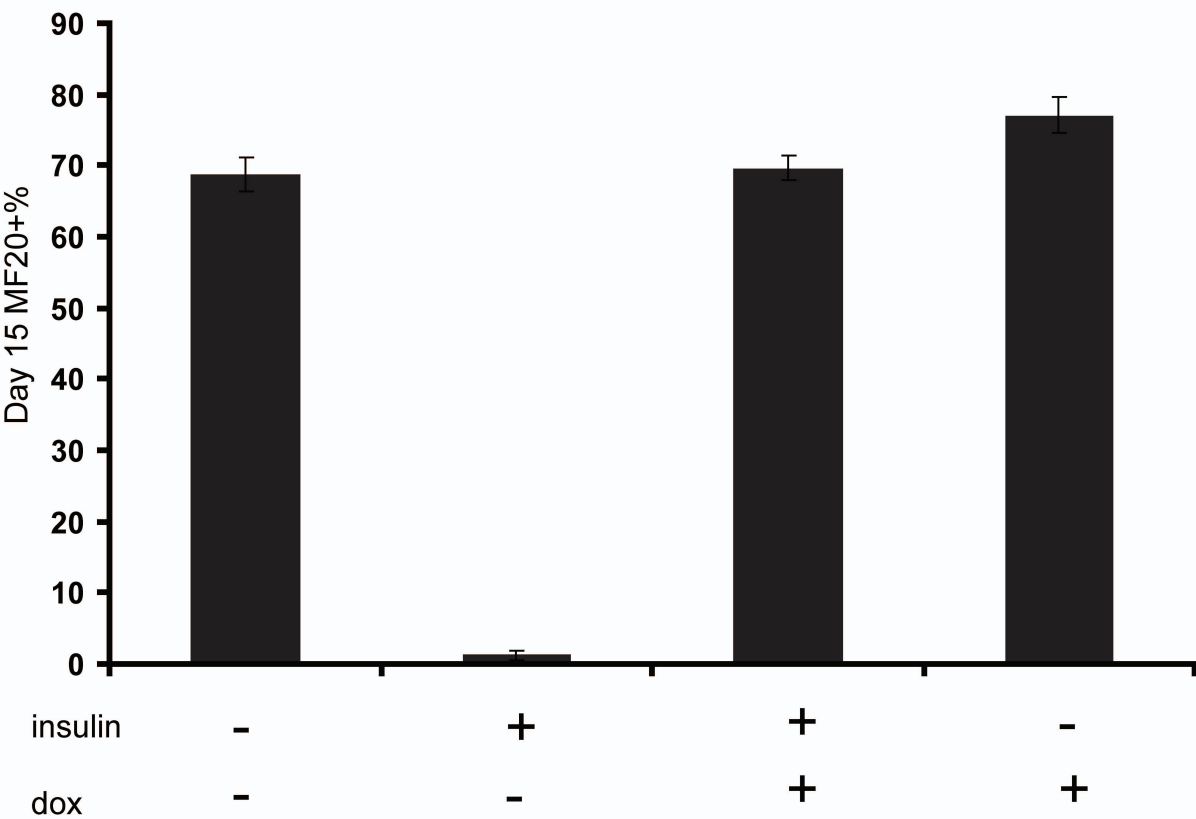

% cells

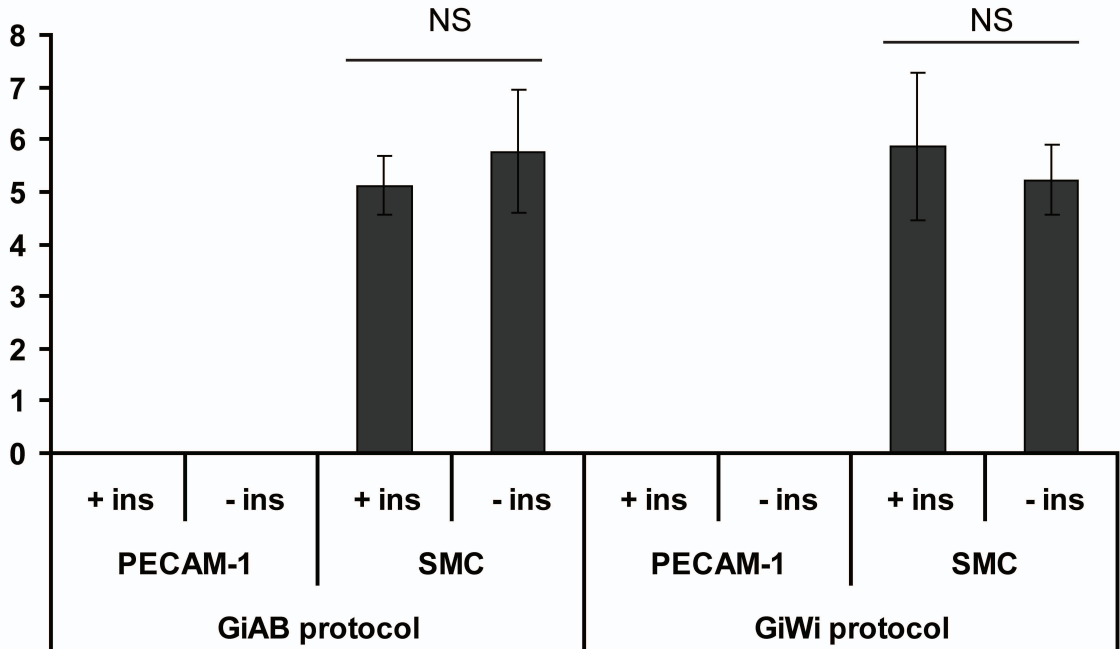

Supplement: NIHMS428124-supplement-Supp_Fig_S1-S5.pdf [file NIHMS428124-supplement-Supp_Fig_S1-S5.pdf]
